# Supplementary material for: Post-assembly modification of polymeric composite membranes using spin drying for fuel cell applications
Source: Royal Society of Chemistry journal article supplement (doi:10.1039/c8ta10538c), 2019-01-01
Supplement: c8ta10538c1.pdf [file c8ta10538c1.pdf]

## Supporting Information

### Post-assembly Modification of Polymeric Composite Membrane using Spin Drying for Fuel Cell Applications

Kyung Ah Lee,<sup>‡ac</sup> Ki Ro Yoon,<sup>‡a</sup> Sung Hyun Kwon,<sup>b</sup> Kyung Jin Lee,<sup>a</sup> Sunhee Jo,<sup>a</sup> Ju Sung Lee,<sup>a</sup> Kwan-Young Lee,<sup>c</sup> Seung Woo Lee,<sup>d</sup> Seung Geol Lee,<sup>\*b</sup> and Jin Young Kim<sup>\*a</sup>

<sup>a</sup>Fuel Cell Research Center, Korea Institute of Science and Technology (KIST), Hwarangno14-gil 5, Seongbuk-gu, Seoul, 02792, Republic of Korea

<sup>b</sup>Department of Organic Material Science and Engineering, Pusan National University, 2, Busandaehak-ro 63beom-gil, Geumjeong-gu, Busan 46241, Republic of Korea

<sup>c</sup>Department of Chemical & Biological Engineering, Korea University, 145 Anam-ro, Seongbuk-gu, Seoul 02841, Republic of Korea

<sup>d</sup>George W. Woodruff School of Mechanical Engineering, Georgia Institute of Technology, Atlanta, Georgia 30332, United States

\*E-mail: jinykim@kist.re.kr (J.Y.Kim); seunggeol.lee@pusan.ac.kr (S.G.Lee)

‡ These authors have contributed equally to this work.

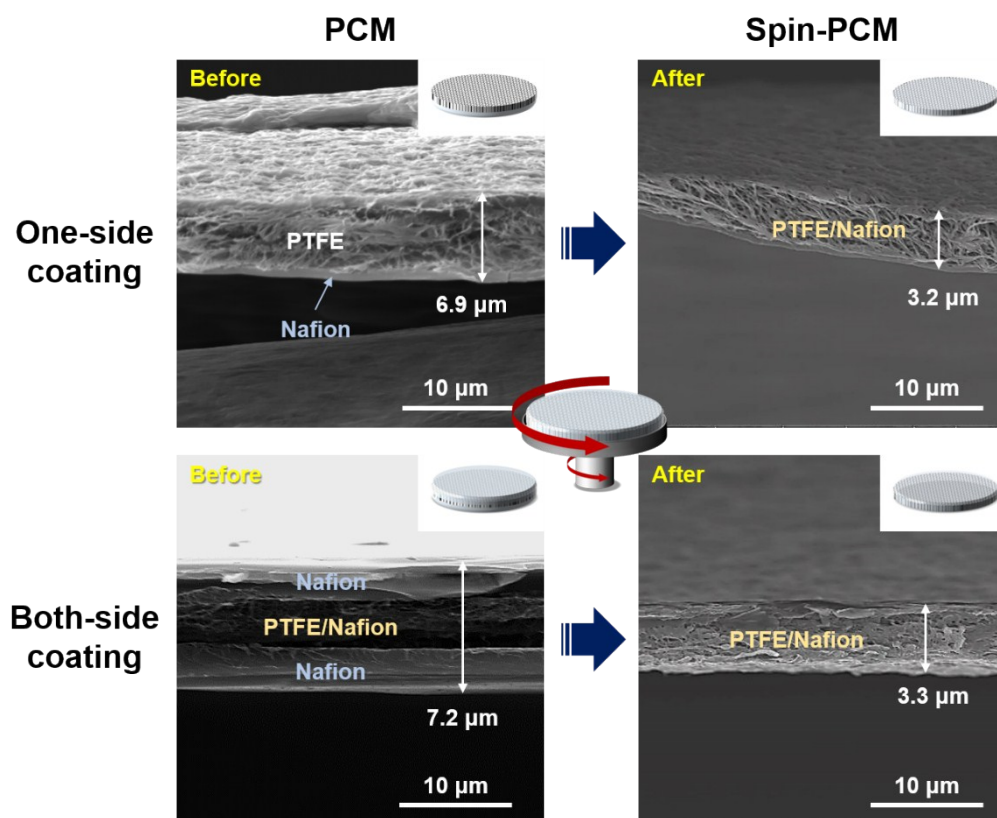

**Fig. S1** The SEM images of one-side and both-side coated PCMs before and after spin-drying (2,000 rpm).

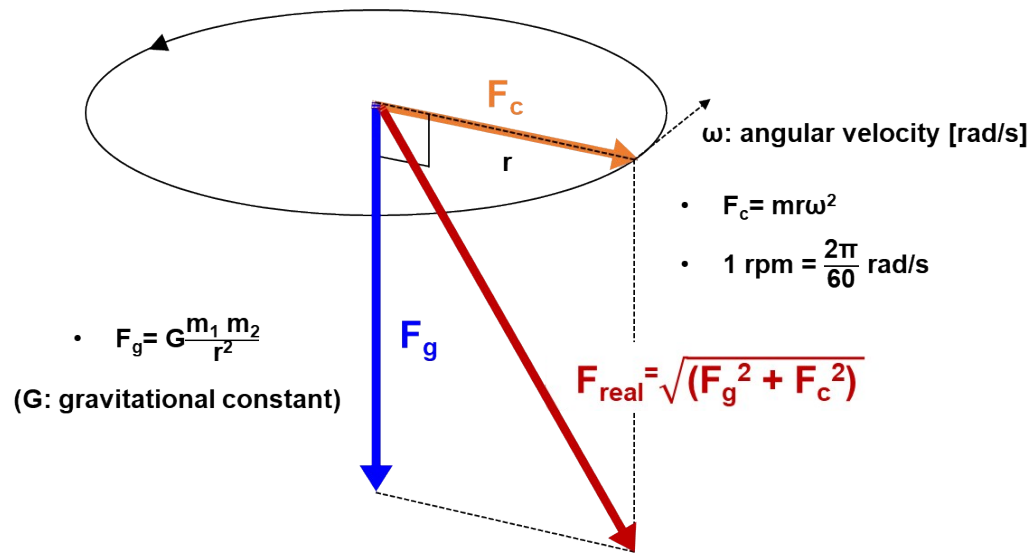

**Fig. S2** The relation between rotating speed and applied real force to the membrane during spin-drying.

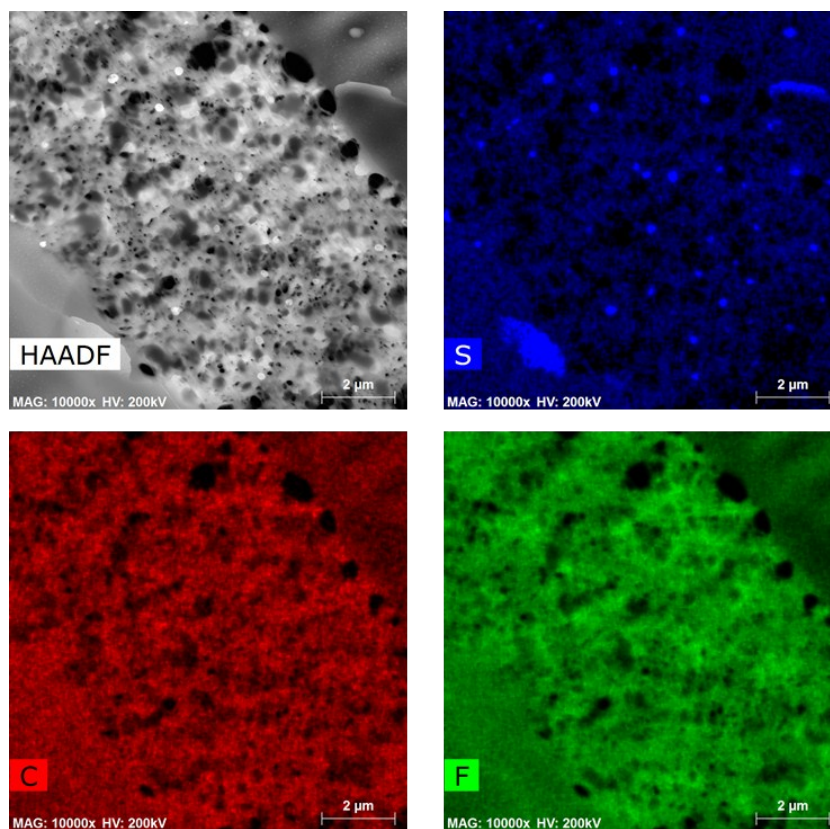

**Fig. S3** The HAADF and corresponding elemental mapping (S, C, and F) images of Spin-PCM (2,000 rpm) obtained from TEM analysis.

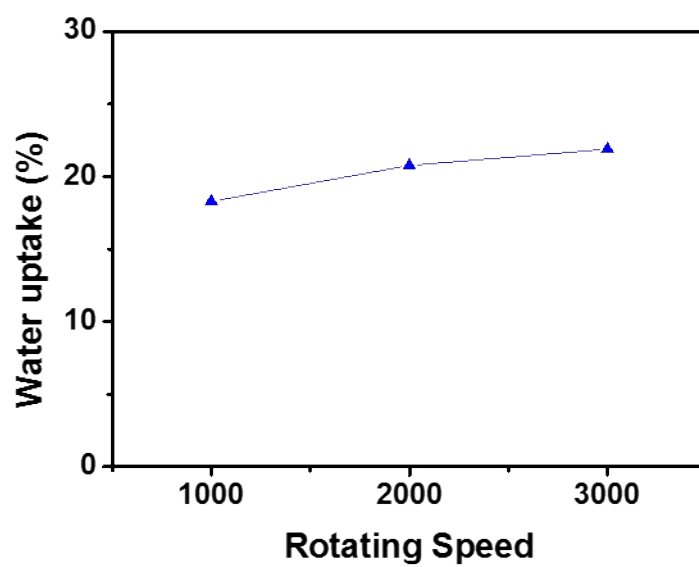

**Fig. S4** Water uptake results of Spin-PCM obtained at different rotating speeds (1,000, 2,000, and 3,000 rpm).

**Spin-PCM**

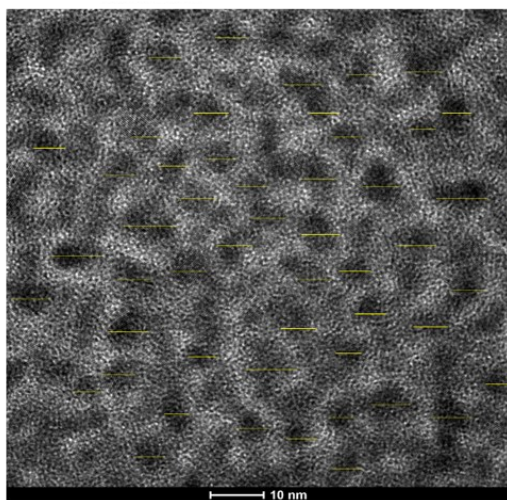

**PCM**

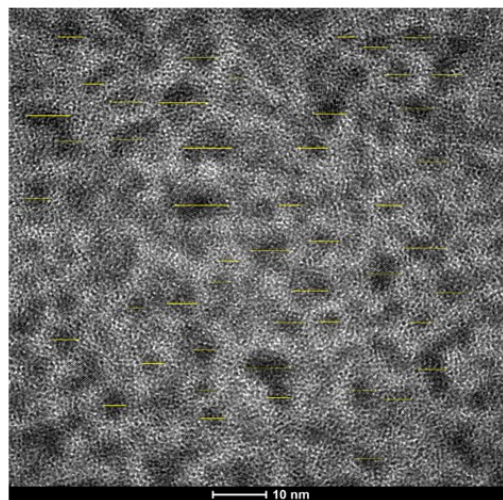

**Fig. S5** Randomly selected dark spots for counting ionic cluster size in PCMs.

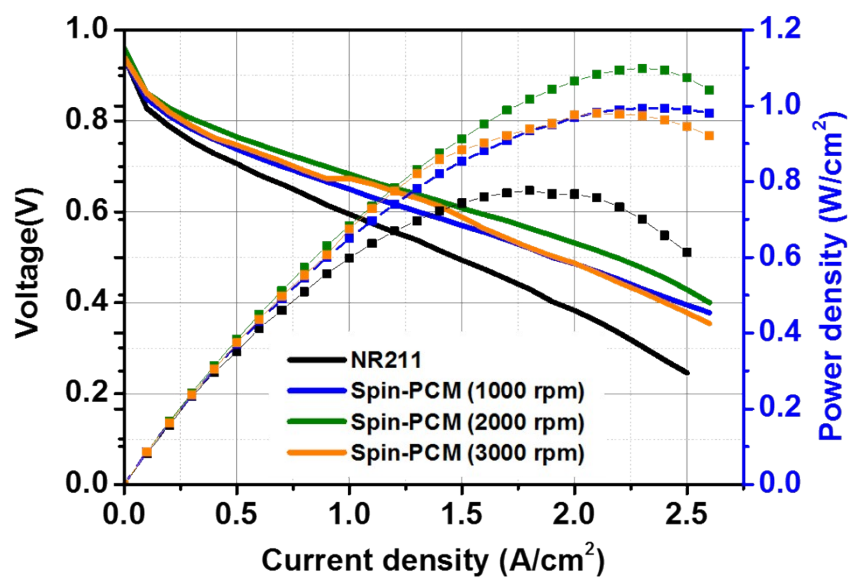

**Fig. S6** Polarization curves and power densities of MEAs using Spin-PCMs (1,000, 2,000 and 3,000 rpm) and commercial NR211 membrane.

## Mechanical Cycle Protocol

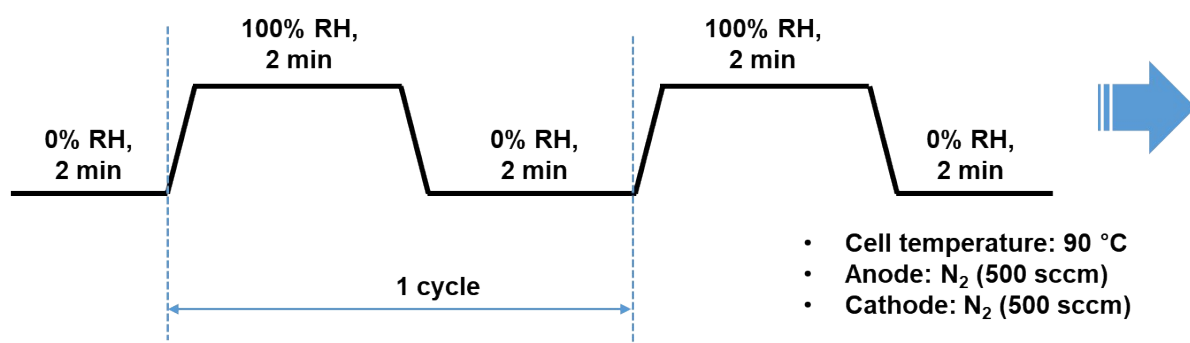

**Fig. S7** Wet/dry cycling protocol with a modified DOE condition.
